# Supplementary material for: The identification of carbon dioxide mediated protein post-translational modifications
Source: PubMed Central journal article supplement (PMC6078960; doi:10.1038/s41467-018-05475-z), 2018-08-06
Supplement: 41467_2018_5475_MOESM2_ESM.pdf [file 41467_2018_5475_MOESM2_ESM.pdf]

## Description of Additional Supplementary Files

File Name: Supplementary Data 1

Description: **The identification of CO<sub>2</sub>-binding proteins.** High resolution MSMS spectra data for peptides that were identified with ethyl-trapped carbamates on Lys residues.
